# Supplementary material for: Meltwater storage in low-density near-surface bare ice in the Greenland ice sheet ablation zone
Source: Copernicus journal article supplement (doi:10.5194/tc-12-955-2018), 2018-03-21
Supplement: Supplementary file 1 [file tc-12-955-2018-supplement.zip]

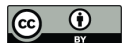

## *Supplement of*

# **Meltwater storage in low-density near-surface bare ice in the Greenland ice sheet ablation zone**

**Matthew G. Cooper et al.**

*Correspondence to:* Matthew G. Cooper (guycooper@ucla.edu)

- tc-12-955-2018-supplement-title-page.pdf
- plot\_data.xlsx

The copyright of individual parts of the supplement might differ from the CC BY 4.0 License.
